# Supplementary material
Source: PubMed Central journal article supplement (PMC3936584)
Supplement: supp_mct289_mct289supp.pdf [file supp_mct289_mct289supp.pdf]

## SUPPLEMENTARY DATA

Fig. S1. Histogram showing the density in three populations (BP, BH and GB) of *P. virginiana* as trees per m<sup>2</sup>. Shared letters above columns indicate that the averages are not significantly different.

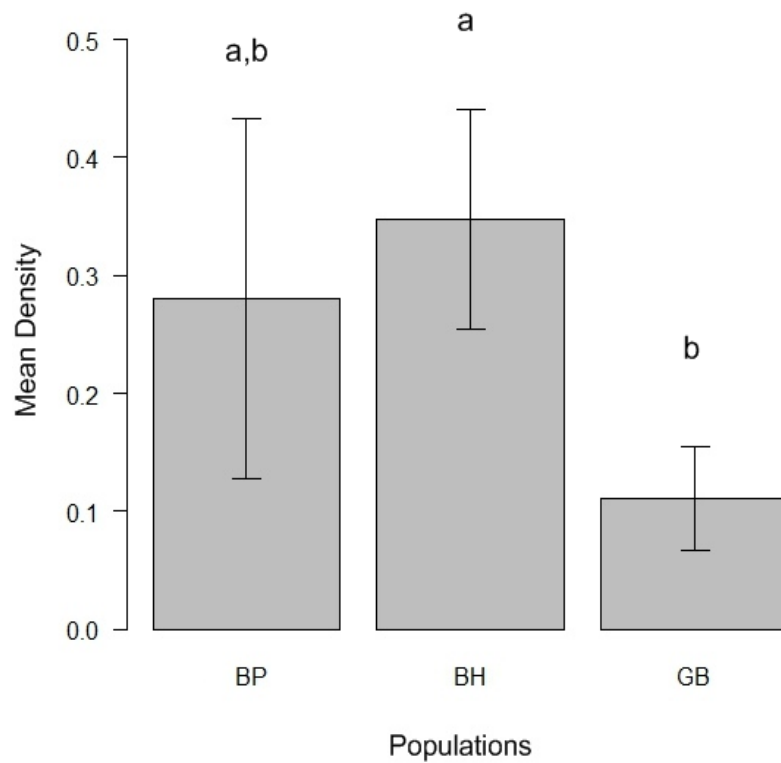

Table S1. AIC values for model comparison.

| Response Variable | Fixed Effects       | d.f. | AIC    | BIC    |
|-------------------|---------------------|------|--------|--------|
| Open Fruit Set    | Population and Year | 6    | 293.58 | 308.97 |
|                   | Population          | 5    | 275.19 | 288.01 |
| Pollen Limitation | Population and Year | 6    | 36.583 | 50.567 |
|                   | Population          | 5    | 34.674 | 46.327 |

Table S2. Microsatellite primer names, sequences, repeat motifs, annealing temperatures (Tm °C) and size ranges (base pairs) previously reported and found in two populations of *P. virginiana*.

| Name      | Primers                                                            | Repeats               | Tm | Size reported | Size    | Cross-Amplification in other <i>Prunus</i> species |                   |                     |                      |                 |                   | References                                                                     |
|-----------|--------------------------------------------------------------------|-----------------------|----|---------------|---------|----------------------------------------------------|-------------------|---------------------|----------------------|-----------------|-------------------|--------------------------------------------------------------------------------|
|           |                                                                    |                       |    |               |         | <i>P. mahaleb</i>                                  | <i>P. persica</i> | <i>P. armeniaca</i> | <i>P. cerasifera</i> | <i>P. avium</i> | <i>P. cerasus</i> |                                                                                |
| UDP96-005 | GTAACGCTCGCTACCACAAA                                               | (AC)16TG(CT)2CA(CT)11 | 55 | 100-150       | 100-174 | x                                                  | x                 | x                   |                      | x               | x                 | Cipriani <i>et al</i> 1999, Wunsch <i>et al</i> 2009                           |
| UDP96-018 | CCTGCATATCACCACCCAG<br>TTCTAATCTGGGCTATGGCG                        | (AC)21                | 53 | 200-300       | 243-269 | x                                                  | x                 |                     |                      | x               | x                 | Cipriani <i>et al</i> 1999, Wunsch <i>et al</i> 2006                           |
| UDP97-402 | GAAGTTCACATTTACGACAGGG<br>TCCCATAACCAAAAAAAAAACACC                 | (AG)17                | 48 | 70-120        | 114-174 | x                                                  |                   |                     |                      | x               | x                 | Cipriani <i>et al</i> 1999, Wunsch <i>et al</i> 2002, Wunsch <i>et al</i> 2009 |
| BPPCT007  | TGGAGAAGGGTGGGTACTTG<br>TCATTGCTCGTCATCAGC                         | (AG)22 (CG)2 (AG)4    | 53 | 100-150       | 108-158 | x                                                  | x                 | x                   | x                    | x               |                   | Dirlwanger <i>et al</i> 2004, Wunsch <i>et al</i> 2009                         |
| ps12a02   | CAGATTTCTGAAGTTAGCGGTA<br>GCCACCAATGGTTCTTCC                       | (GA)22                | 53 | 150-200       | 140-176 | x                                                  | x                 | x                   |                      | x               |                   | Sosinski <i>et al</i> 2000, Downey <i>et al</i> 2000, Wunsch <i>et al</i> 2009 |
| ps08e08   | AGCACCAGATGCACCTGA<br>CCCAATGAACAACCTGCAT                          | (CAA)7                | 48 | 100-200       | 138-171 | x                                                  | x                 | x                   |                      | x               |                   | Sosinski <i>et al</i> 2000, Wunsch <i>et al</i> 2009                           |
| MA006b    | CATATCAATCACTGGGATG<br>ACAACTTACCATTTGAGGCT                        | (AG)18                | 48 | 200-250       | 238-276 |                                                    | x                 |                     |                      |                 | x                 | Ohta <i>et al</i> 2005, Yamamoto <i>et al</i> 2002                             |
| M4c       | CAATCATTCAAGCTCTCTCC<br>GAATTTGTTCTCTCTCTC<br>GGAAGCGTTCGTCTGCAAAT | (TC)17                | 48 | 50-159        | 76-108  |                                                    | x                 |                     |                      |                 | x                 | Ohta <i>et al</i> 2005, Yamamoto <i>et al</i> 2002                             |
